# Supplementary material for: Two novel ACE inhibitory peptides isolated from longan seeds: purification, inhibitory kinetics and mechanisms
Source: Royal Society of Chemistry journal article supplement (doi:10.1039/d0ra00093k), 2020-01-01
Supplement: d0ra00093k1.pdf [file d0ra00093k1.pdf]

(a)

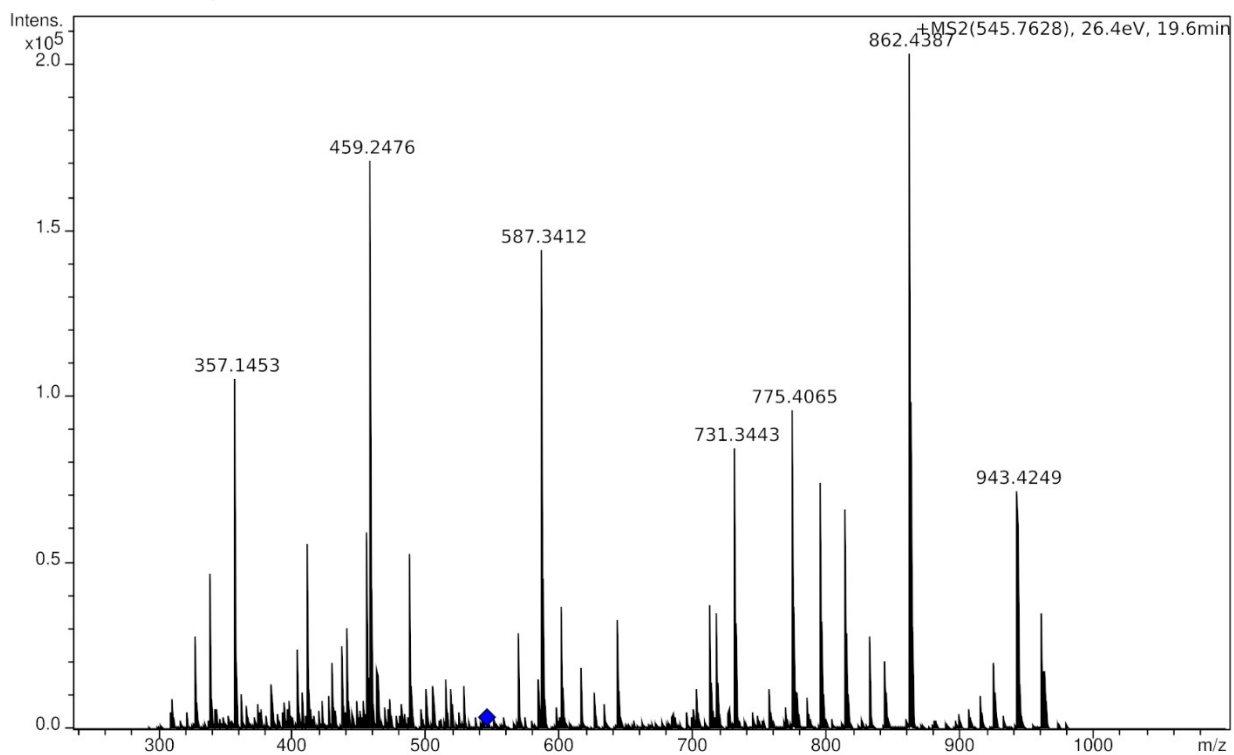

(b)

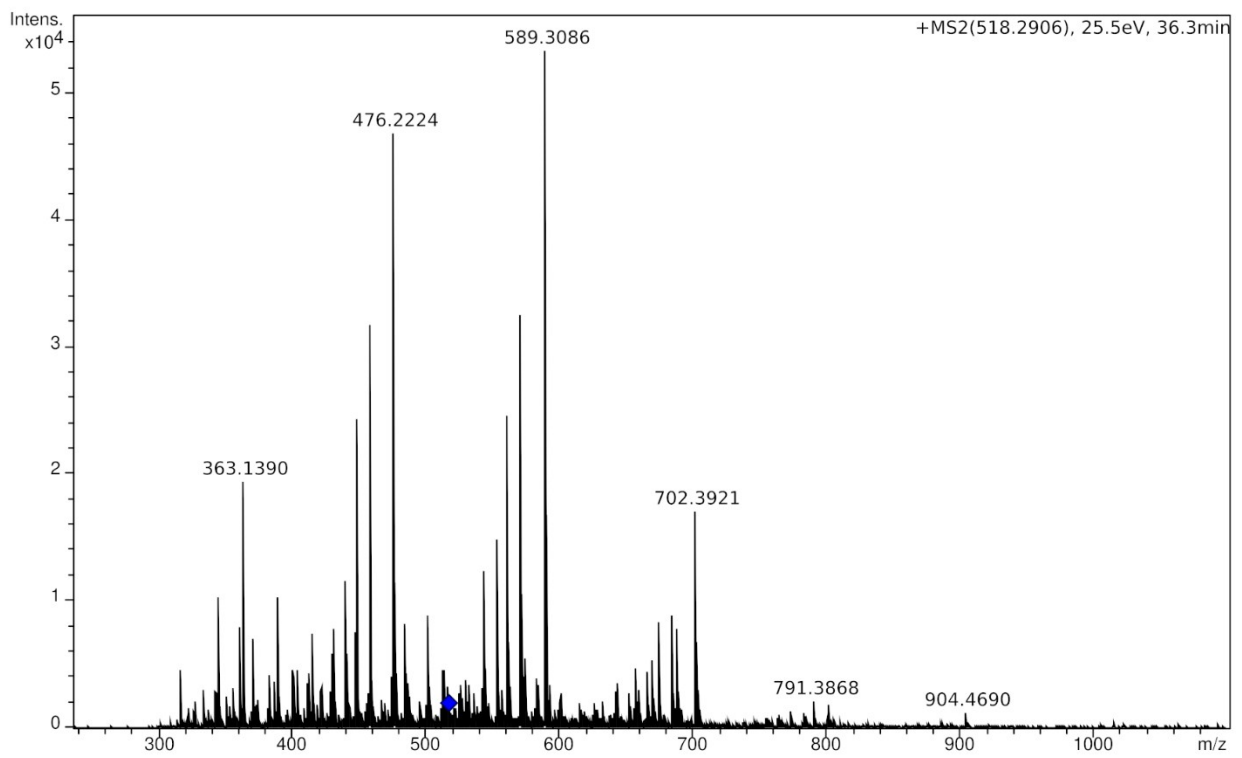

**Fig S1.** ESI-Q-TOF MS/MS spectrum of (a) m/z 546.7745 identified as ETSGMKPTEL, and (b) m/z 518.2904 identified as ISSMGILVCL.
